# Supplementary material for: Protodecarboxylation of benzoic acids under radical conditions
Source: Royal Society of Chemistry journal article supplement (doi:10.1039/c2cc33306f), 2012-01-01

## Protodecarboxylation of benzoic acids under radical conditions

Sangwon Seo,<sup>a</sup> John B. Taylor<sup>b</sup> and Michael F. Greaney<sup>a\*</sup>

<sup>a</sup>*School of Chemistry, University of Manchester, Oxford Road, Manchester, M13 9PL, UK*

<sup>b</sup>*Syngenta, Jealott's Hill International Research Centre, Bracknell, RG42 6EY, UK.*

michael.greaney@manchester.ac.uk

### Supporting Information

#### Contents

|                                   |           |
|-----------------------------------|-----------|
| <b>1: Experimental Procedures</b> | <b>S1</b> |
| <b>2: NMR Spectra</b>             | <b>S5</b> |

#### I. Experimental Procedures

##### General Methods:

<sup>1</sup>H and <sup>13</sup>C NMR spectra were recorded on a Bruker Ava400 (400 MHz) instrument and calibrated to residual solvent peaks: proton (CDCl<sub>3</sub>: 7.26 ppm) and carbon (CDCl<sub>3</sub>: 77.0 ppm). The <sup>1</sup>H data is presented as follows: chemical shift (in ppm on the δ scale), multiplicity (bs=broad singlet, s=singlet, d=doublet, t=triplet, q=quartet, m=multiplet), the coupling constant (J, in Hertz) and integration. The <sup>13</sup>C data is reported as the ppm on the δ scale followed by the interpretation. TLC was performed on Merck 60F<sub>254</sub> silica plates and visualised by UV light and potassium permanganate stains. The compounds were purified by flash chromatography using Merck Kieselgel 60 (particle size 40-63 μm) silica under a positive pressure. The eluent is quoted as a percentage. Anhydrous MeCN used for the proto-decarboxylation reaction was bought from Sigma-Aldrich and used as received. All other chemicals were purchased from a chemical supplier and used as received.

### Protodecarboxylation of Benzoic Acids:

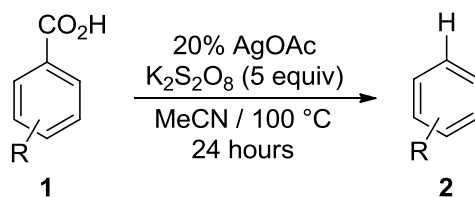

**Scheme S1.** Protodecarboxylation.

**General procedure:** A carousel tube (30 mL) was charged with compound **1** (0.3 mmol), AgOAc (10.0 mg, 0.06 mmol) and  $\text{K}_2\text{S}_2\text{O}_8$  (405.5 mg, 1.5 mmol) in MeCN (3 mL), sealed and heated at 100 °C for 24 hr. The reaction mixture was allowed to cool down, diluted with  $\text{Et}_2\text{O}$  (10 mL) and poured into saturated aqueous  $\text{NaHCO}_3$  (10 mL). The resulting mixture was extracted with  $\text{Et}_2\text{O}$  ( $2 \times 10$  mL) and the combined organic layers were dried over  $\text{MgSO}_4$ , filtered, and carefully concentrated under reduced pressure. In the case of volatile arenes (**2e**, **2f**, **2g**, **2h**, **2i**, **2k**, **2l** and **2m**) the reaction was quantified at this point using  $^1\text{H}$  NMR. For less volatile arenes, the crude product was loaded onto a short column of silica and eluted with  $\text{Et}_2\text{O}$ /Pentane 0 – 10 %. The product-containing fractions were combined and concentrated under reduced pressure to yield product **2**.<sup>1</sup>

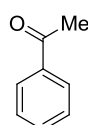

**Acetophenone (2a).** Compound **2a** was prepared following the general procedure with 4-acetylbenzoic acid (**1a**) (49.2 mg, 0.3 mmol). Colourless oil, Yield = 78%;  $^1\text{H}$  NMR (400 MHz,  $\text{CDCl}_3$ ):  $\delta$  7.97 – 7.95 (m, 2H), 7.59 – 7.55 (m, 1H), 7.49 – 7.45 (m, 2H), 2.61 (s, 3H);  $^{13}\text{C}$  NMR (100 MHz,  $\text{CDCl}_3$ ):  $\delta$  198.2 (CO), 137.1 (quat), 133.1 (CH), 128.5 (2CH), 128.3 (2CH), 26.6 ( $\text{CH}_3$ ).

3-Acetylbenzoic acid (**1b**) (49.2 mg, 0.3 mmol) was also protodecarboxylated following the same procedure to yield **2a** in 63% yield.

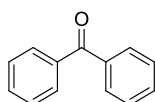

**Benzophenone (2b).** Compound **2b** was prepared following the general procedure with 4-benzoylbenzoic acid (**1c**) (54.7 mg, 0.3 mmol). White soli, Yield = 75%;  $^1\text{H}$  NMR (400 MHz,  $\text{CDCl}_3$ ):  $\delta$  7.83 – 7.79 (m, 4H), 7.62 – 7.57 (m, 2H), 7.51 – 7.47 (m, 4H);  $^{13}\text{C}$  NMR (100 MHz,  $\text{CDCl}_3$ ):  $\delta$  196.7 (CO), 137.5 (2quat), 132.4 (2CH), 130.0 (4CH), 128.2 (4CH).

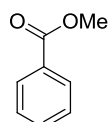

**Methyl benzoate (2c).** Compound **2c** was prepared following the general procedure with 4-(methoxycarbonyl)benzoic acid (**1d**) (54.0 mg, 0.3 mmol). Colourless oil, Yield = 82%;  $^1\text{H}$  NMR (400 MHz,  $\text{CDCl}_3$ ):  $\delta$  8.05 – 8.03 (m, 2H), 7.57 – 7.53 (m, 1H), 7.45 – 7.41 (m, 2H), 3.91 (s, 3H);  $^{13}\text{C}$  NMR (100 MHz,  $\text{CDCl}_3$ ):  $\delta$  167.1 (CO), 132.8 (CH), 130.1 (quat), 129.5 (2CH), 128.3 (2CH), 52.0 ( $\text{CH}_3$ ).

3-(Methoxycarbonyl)benzoic acid (**1e**) (54.0 mg, 0.3 mmol) was also protodecarboxylated following the same procedure to yield **2d** in 81% yield.

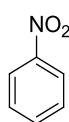

**Nitrobenzene (2d).** Compound **2d** was prepared from 3-nitrobenzoic acid (**1f**) (50.1 mg, 0.3 mmol), following the modified procedure using AgOAc (20.0 mg, 0.12 mmol) and  $\text{K}_2\text{S}_2\text{O}_8$  (405.5 mg, 1.5 mmol). Yellow liquid, Yield = 54%;  $^1\text{H}$  NMR (400 MHz,  $\text{CDCl}_3$ ):  $\delta$  8.22 – 8.19 (m, 2H), 7.71 – 7.67 (m, 1H), 7.56 – 7.52 (m, 2H);  $^{13}\text{C}$  NMR (100 MHz,  $\text{CDCl}_3$ ):  $\delta$  148.1 (quat), 134.5 (CH), 129.2 (2CH), 123.4 (2CH).

<sup>1</sup> CAS registry numbers for protodecarboxylated products **2**: Acetophenone **2a** [98-86-2], benzophenone **2b** [119-61-9], methyl benzoate **2c** [93-58-3], nitrobenzene **2d** [98-95-3], (trifluoromethyl)benzene **2e** [98-08-8], fluorobenzene **2f** [462-06-6], bromobenzene **2g** [108-86-1], iodobenzene **2h** [591-50-4], benzene **2i** [71-43-2], 1-bromo-2-nitrobenzene **2j** [577-19-5], 1-chloro-2-fluorobenzene **2k** [348-51-6], 1-bromo-2-fluorobenzene **2l** [1072-81-5], anisole **2m** [100-66-3], 1-methoxy-3-nitrobenzene **2n** [555-03-3], phenyl acetate [122-79-2].

4-Nitrobenzoic acid (**1g**) (50.1 mg, 0.3 mmol) and was also protodecarboxylated following the same procedure to yield **2d** in 61% yield.

2-Nitrobenzoic acid (**1n**) (50.1 mg, 0.3 mmol) was protodecarboxylated following the general procedure to yield **2d** in 84% yield.

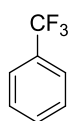

**(Trifluoromethyl)benzene (2e)**. Compound **2e** was prepared following the general procedure with 3-(trifluoromethyl)benzoic acid (**1h**) (36.6 mg, 0.3 mmol). The yield of compound **2e** was determined to be 68% by  $^1\text{H}$  NMR using nitromethane as the internal standard.

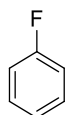

**Fluorobenzene (2f)**. Compound **2f** was prepared following the general procedure with 4-fluorobenzoic acid (**1i**) (42.0 mg, 0.3 mmol). The yield of compound **2f** was determined to be 64% by  $^1\text{H}$  NMR using nitromethane as the internal standard.

3-Fluorobenzoic acid (**1j**) (42.0 mg, 0.3 mmol) was also protodecarboxylated following the same procedure to yield **2f** in 57% yield, determined by  $^1\text{H}$  NMR using nitromethane as the internal standard.

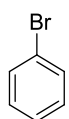

**Bromobenzene (2g)**. Compound **2g** was prepared following the general procedure with 4-bromobenzoic acid (**1k**) (60.3 mg, 0.3 mmol). The yield of compound **2g** was determined to be 67% by  $^1\text{H}$  NMR using nitromethane as the internal standard.

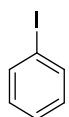

**Iodobenzene (2h)**. Compound **2h** was prepared following the general procedure with 4-iodobenzoic acid (**1l**) (74.4 mg, 0.3 mmol). The yield of compound **2h** was determined to be 40% by  $^1\text{H}$  NMR using nitromethane as the internal standard.

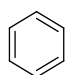

**Benzene (2i)**. Compound **2i** was prepared following the general procedure with benzoic acid (**1m**) (36.6 mg, 0.3 mmol). The yield of compound **2i** was determined to be 52% by  $^1\text{H}$  NMR using nitromethane as the internal standard.

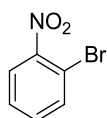

**1-Bromo-2-nitrobenzene (2j)**. Compound **2j** was prepared following the general procedure with 3-bromo-4-nitrobenzoic acid (**1o**) (73.8 mg, 0.3 mmol). Yellow solid, Yield = 43%;  $^1\text{H}$  NMR (400 MHz,  $\text{CDCl}_3$ ):  $\delta$  7.87 – 7.82 (m, 1H), 7.77 – 7.72 (m, 1H), 7.49 – 7.41 (m, 2H);  $^{13}\text{C}$  NMR (100 MHz,  $\text{CDCl}_3$ ):  $\delta$  135.1 (CH), 133.2 (CH), 128.2 (CH), 125.6 (CH), 114.4 (quat).

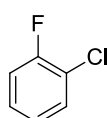

**1-Chloro-2-fluorobenzene (2k)**. Compound **2k** was prepared following the general procedure with 3-chloro-4-fluorobenzoic acid (**1p**) (52.4 mg, 0.3 mmol). The yield of compound **2k** was determined to be 74% by  $^1\text{H}$  NMR using nitromethane as the internal standard.

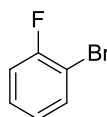

**1-Bromo-2-fluorobenzene (2l)**. Compound **2l** was prepared following the general procedure with 3-bromo-4-fluorobenzoic acid (**1q**) (65.7 mg, 0.3 mmol). The yield of compound **2l** was determined to be 75% by  $^1\text{H}$  NMR using nitromethane as the internal standard.

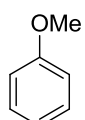

**Anisole (2m)**. Compound **2m** was prepared following the general procedure with 4-methoxybenzoic acid (**1r**) (45.6 mg, 0.3 mmol). The yield of compound **2m** was determined to be 34% by  $^1\text{H}$  NMR using nitromethane as the internal standard.

3-Methoxybenzoic acid (**1s**) (45.6 mg, 0.3 mmol) was also protodecarboxylated following the same procedure to yield **2m** in 45% yield, determined by  $^1\text{H}$  NMR using nitromethane as the internal standard.

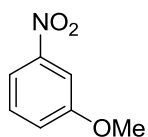

**1-Methoxy-3-nitrobenzene (2n)** Compound **2n** was prepared following the general procedure with 2-nitro-4-methoxybenzoic acid (**1t**) (59.1 mg, 0.3 mmol). Pale yellow solid, Yield = 58%; <sup>1</sup>H NMR (400 MHz, CDCl<sub>3</sub>): δ 7.84 – 7.81 (ddd, J = 8.1, 2.1, 0.9 Hz, 1H), 7.73 – 7.72 (t, J = 2.3 Hz, 1H), 7.45 – 7.41 (t, J = 8.2 Hz, 1H), 7.24 – 7.21 (ddd, J = 8.3, 2.5, 0.9 Hz, 1H), 3.89 (s, 3H); <sup>13</sup>C NMR (100 MHz, CDCl<sub>3</sub>): δ 160.1 (quat), 149.2 (quat), 129.9 (CH), 121.3 (CH), 115.7 (CH), 108.1 (CH), 55.8 (CH<sub>3</sub>).

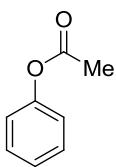

**Phenyl acetate (not in table)**. Phenyl acetate was prepared following the general procedure with 2-acetoxybenzoic acid (54.0 mg, 0.3 mmol). Colourless oil, Yield = 31%; <sup>1</sup>H NMR (400 MHz, CDCl<sub>3</sub>): δ 7.41 – 7.35 (m, 2H), 7.25 – 7.21 (m, 1H), 7.10 – 7.07 (m, 2H), 2.31 (s, 3H); <sup>13</sup>C NMR (100 MHz, CDCl<sub>3</sub>): δ 169.5 (CO), 150.6 (quat), 129.4 (2CH), 125.8 (CH), 121.6 (2CH), 21.1 (CH<sub>3</sub>).

4-Acetoxybenzoic acid (54.0 mg, 0.3 mmol) was also protodecarboxylated following the same procedure to yield phenyl acetate in 25% yield.

## 2. NMR Spectra

### NMR Spectra of Isolated Products

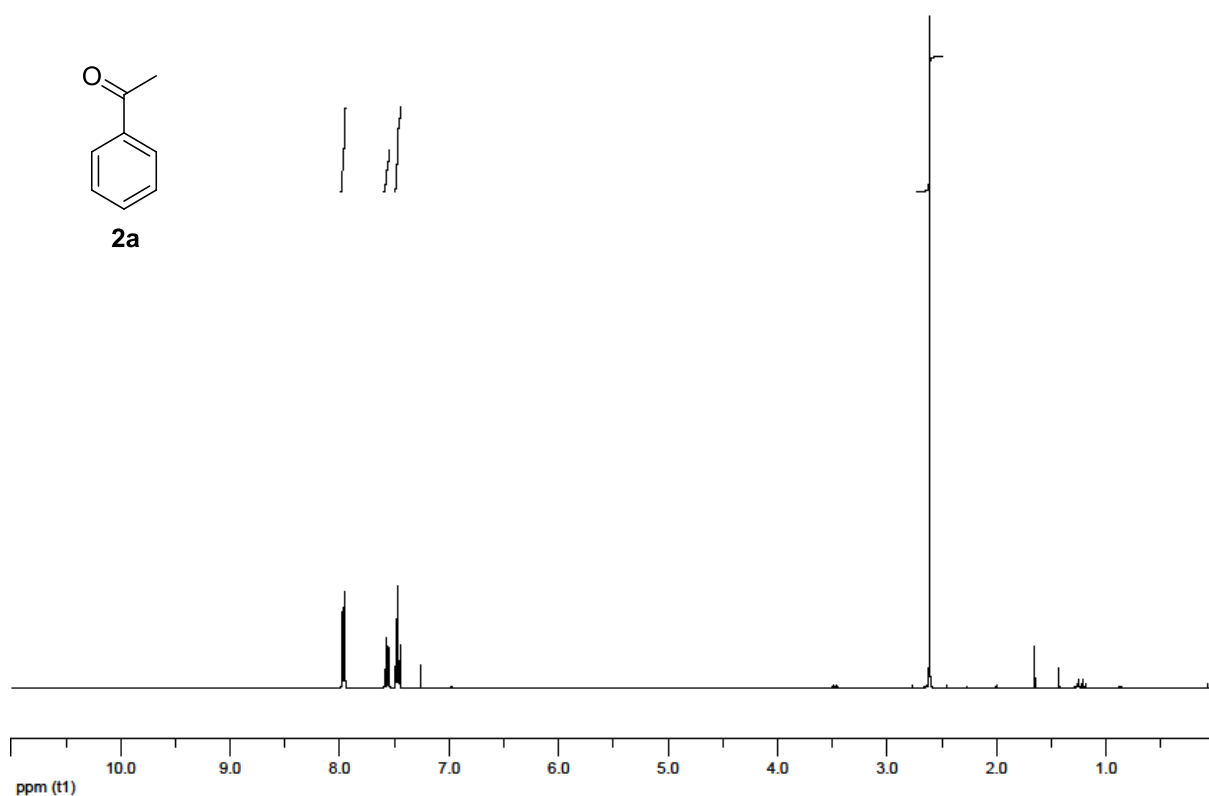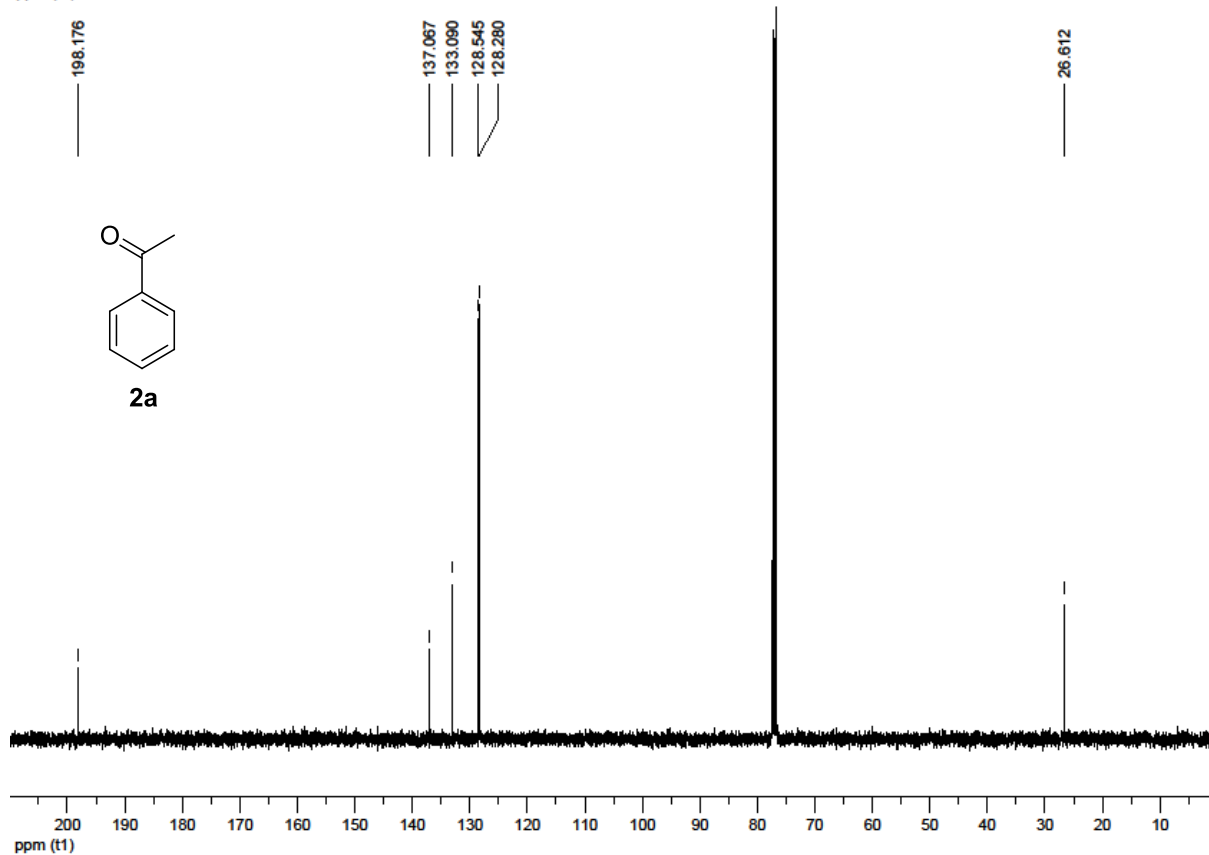

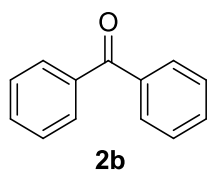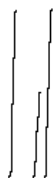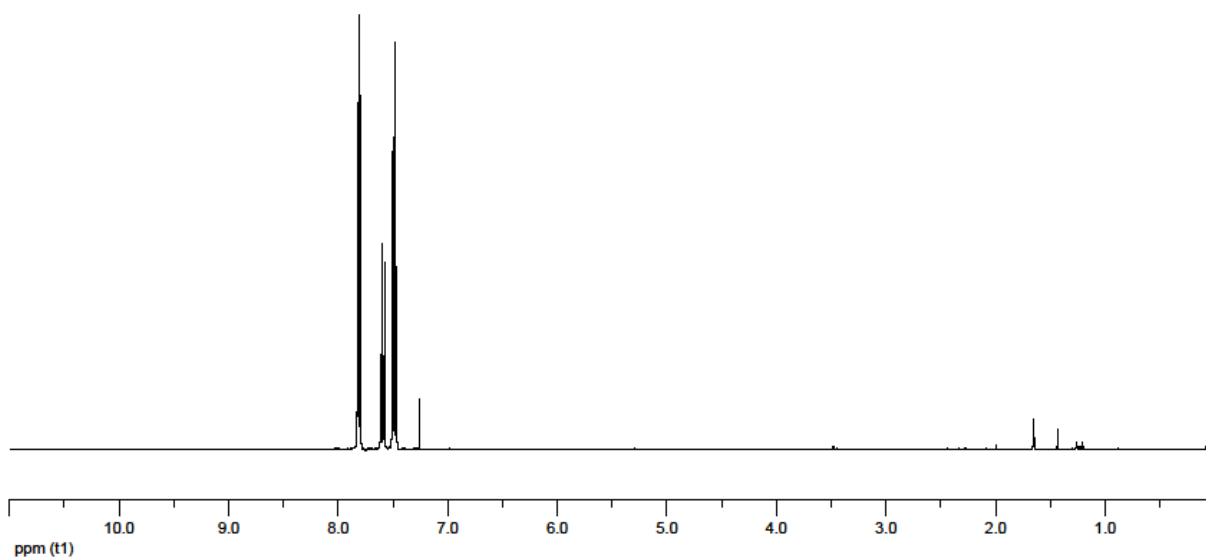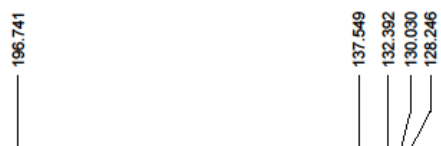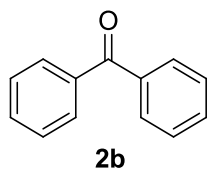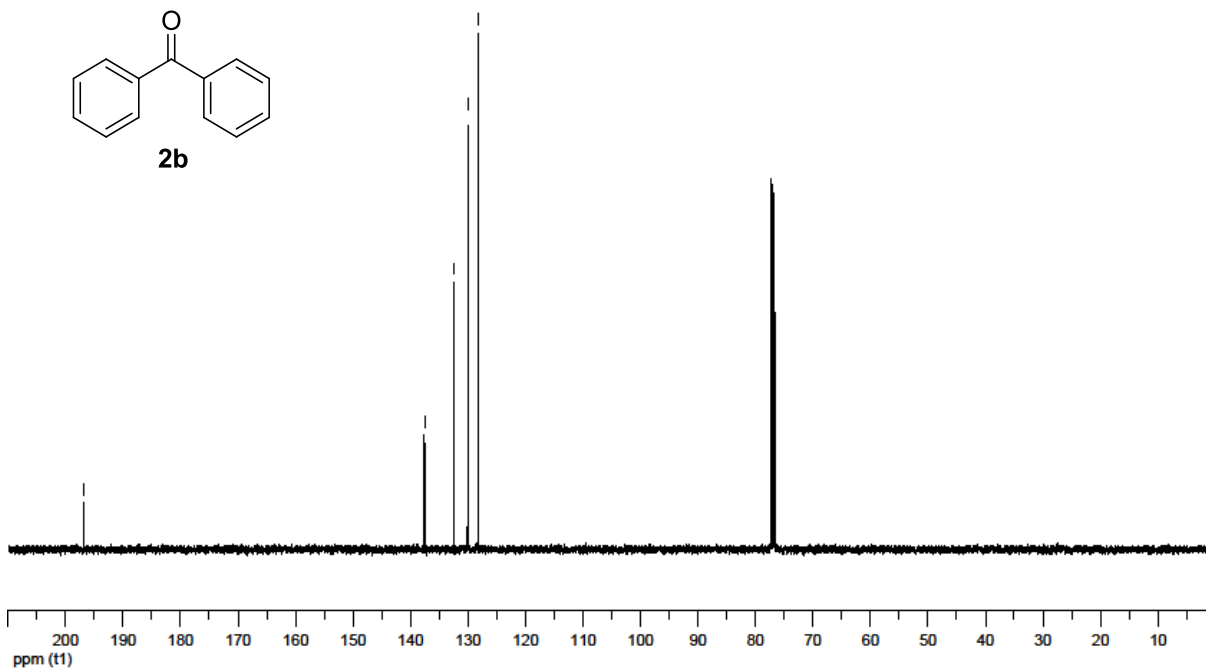

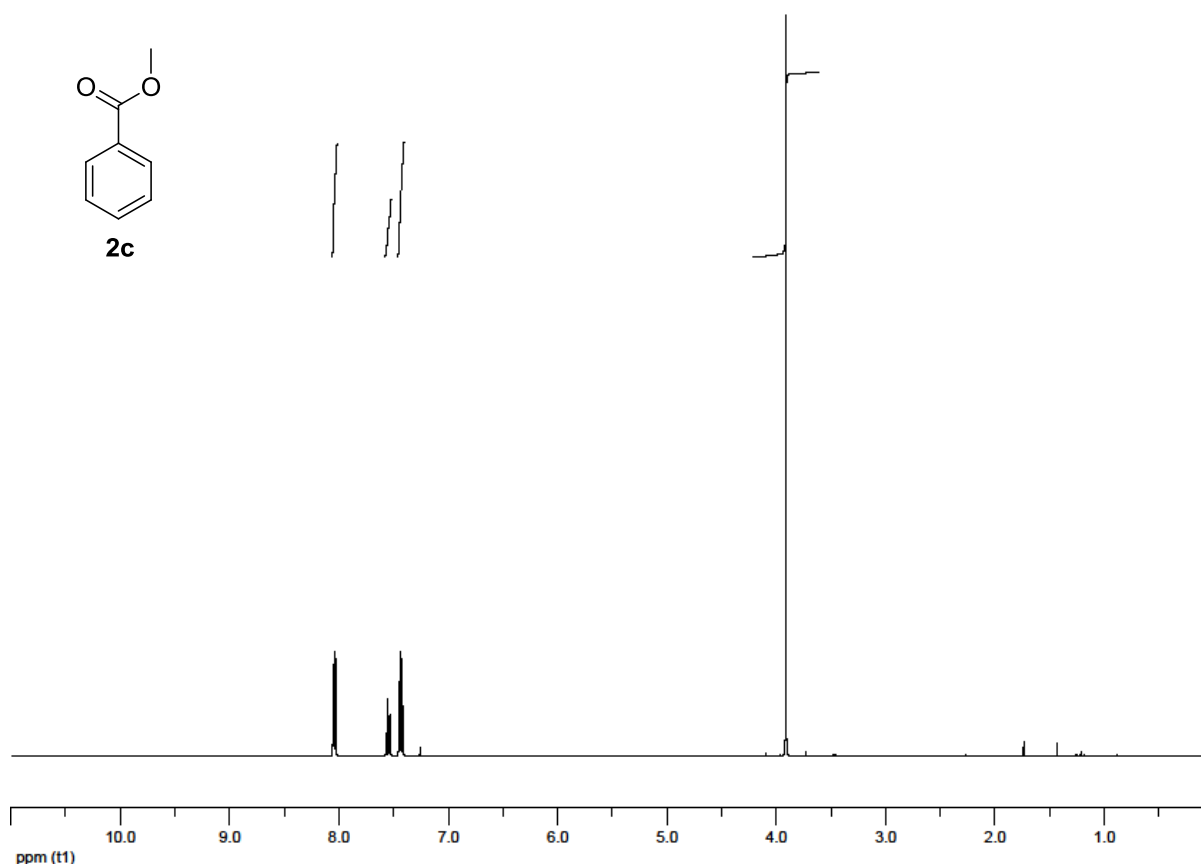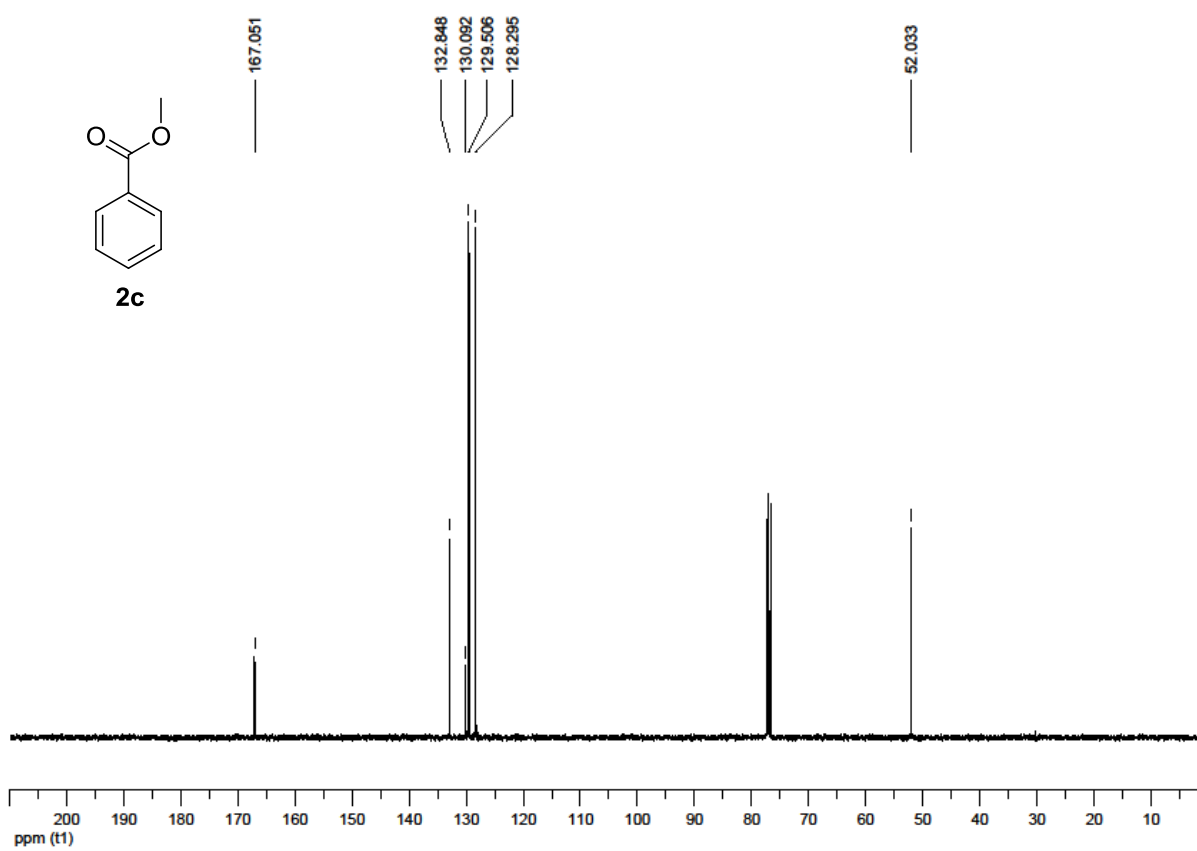

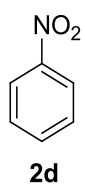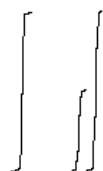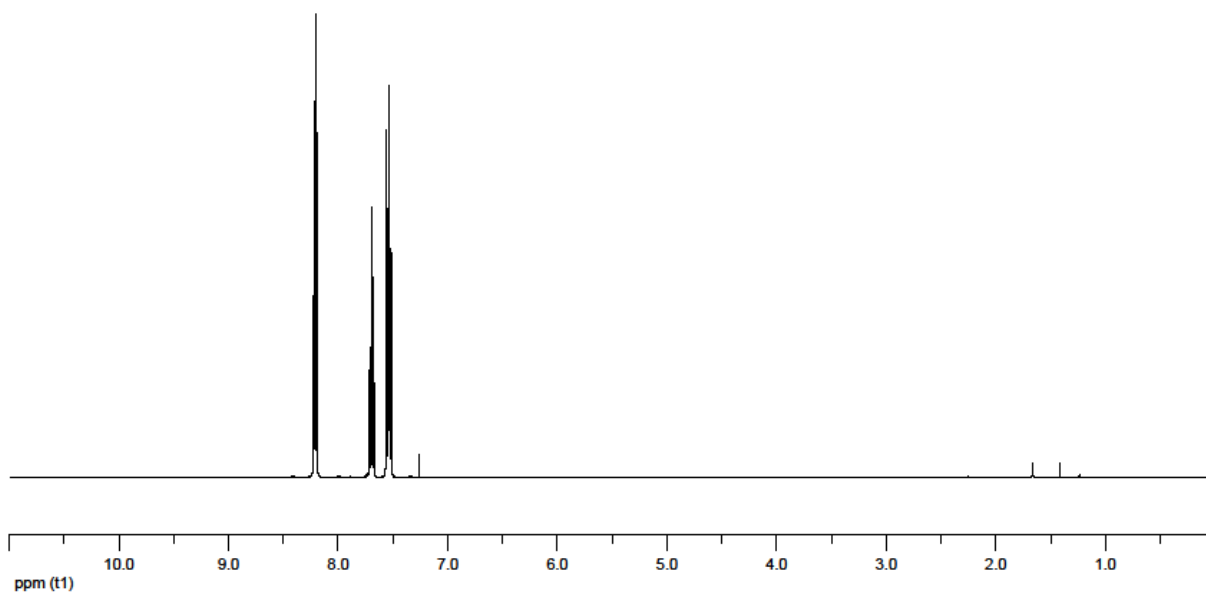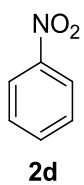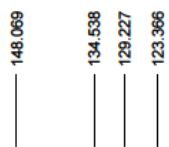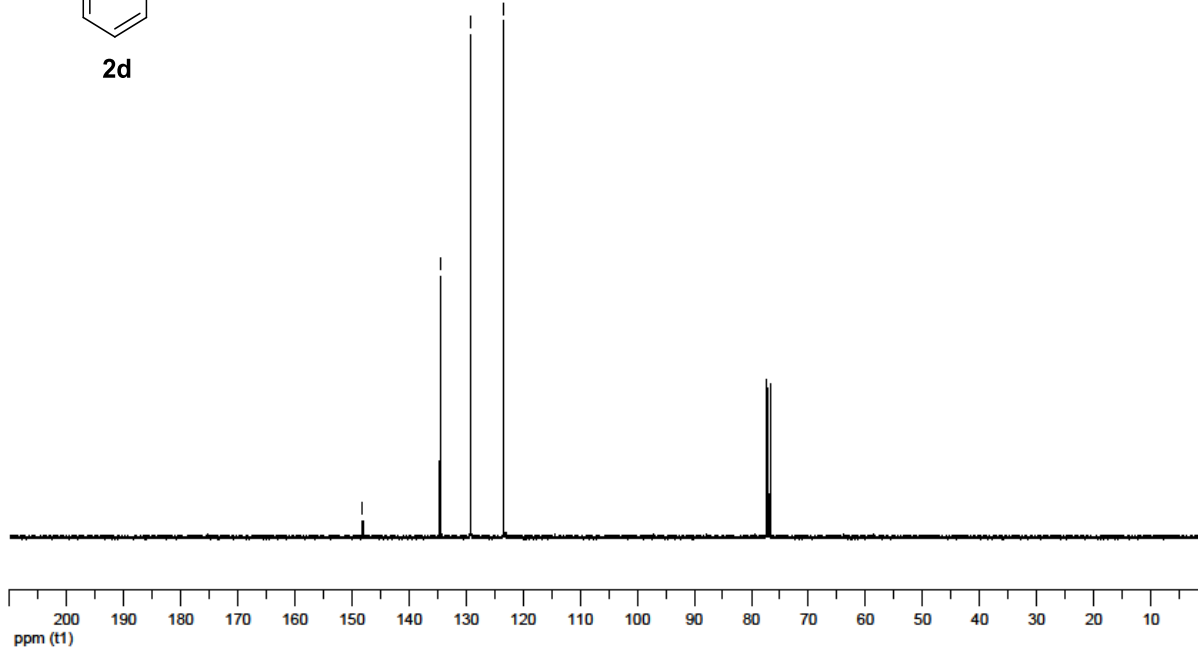



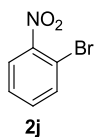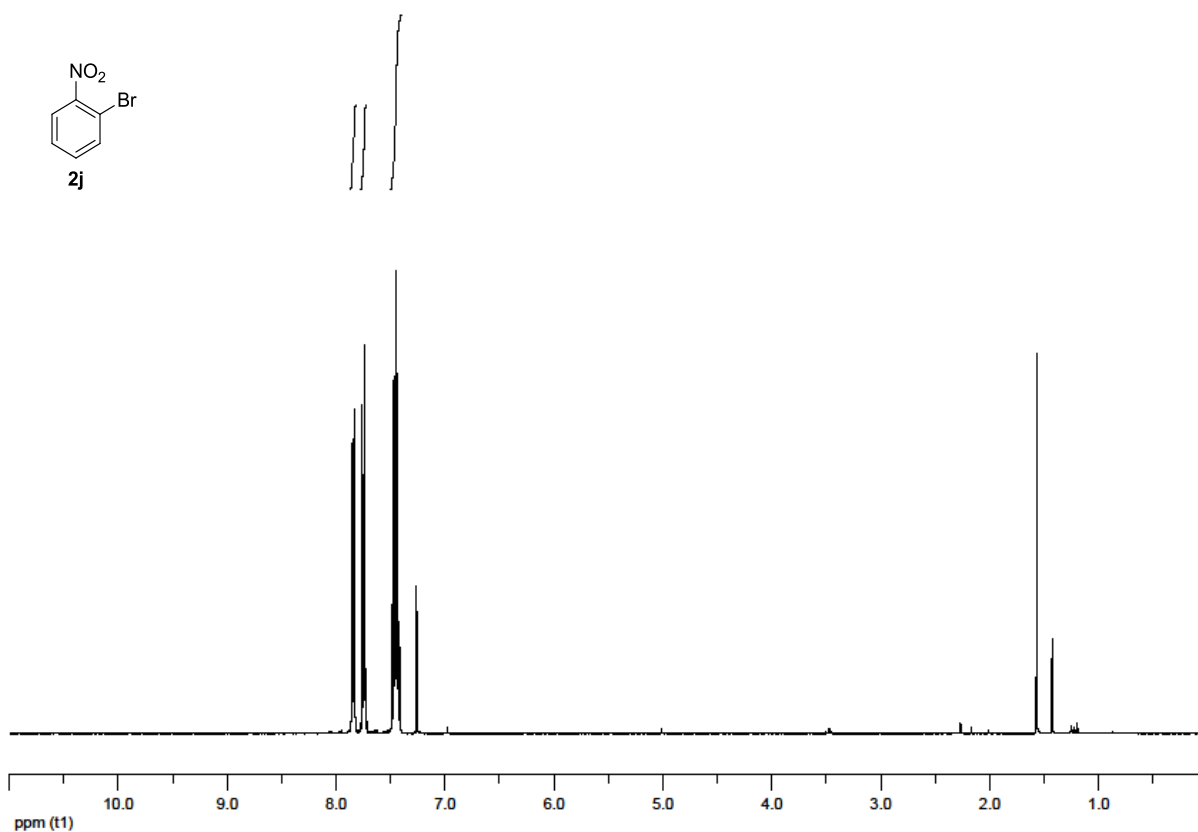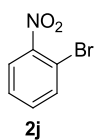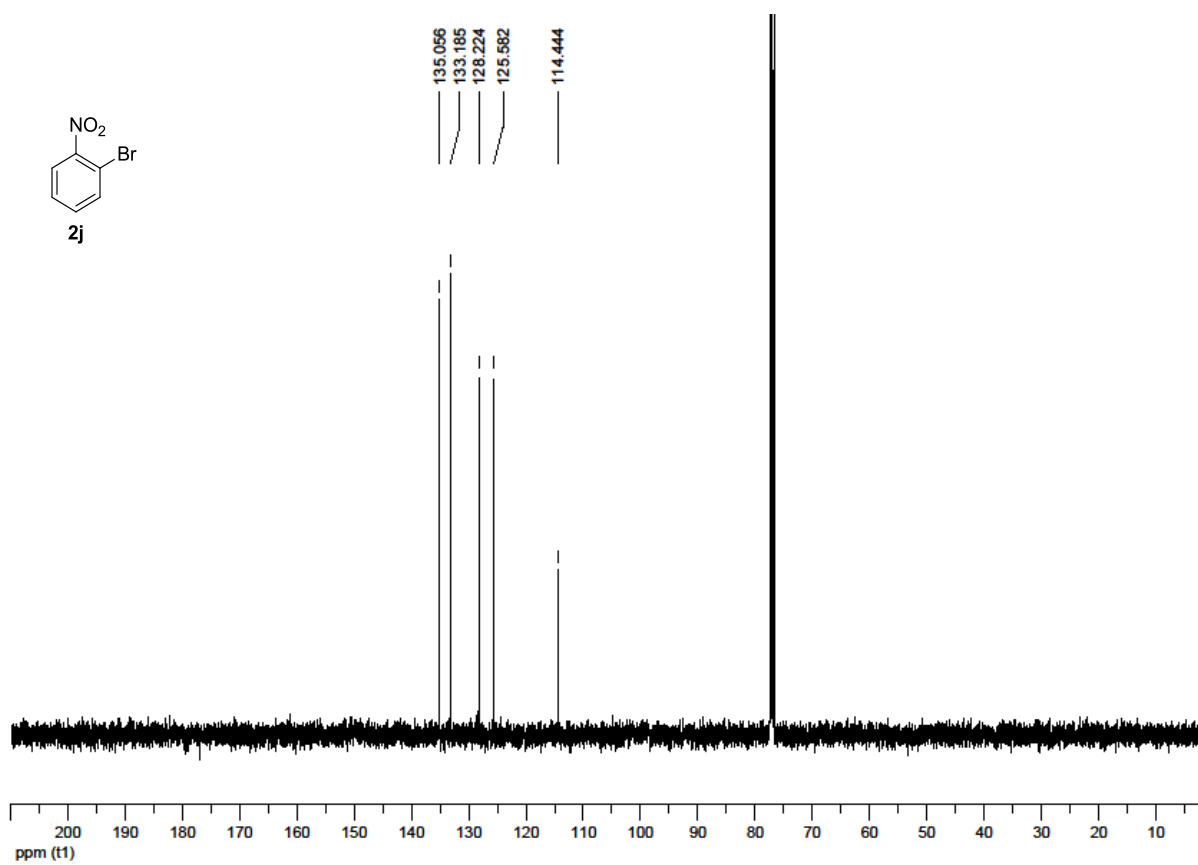

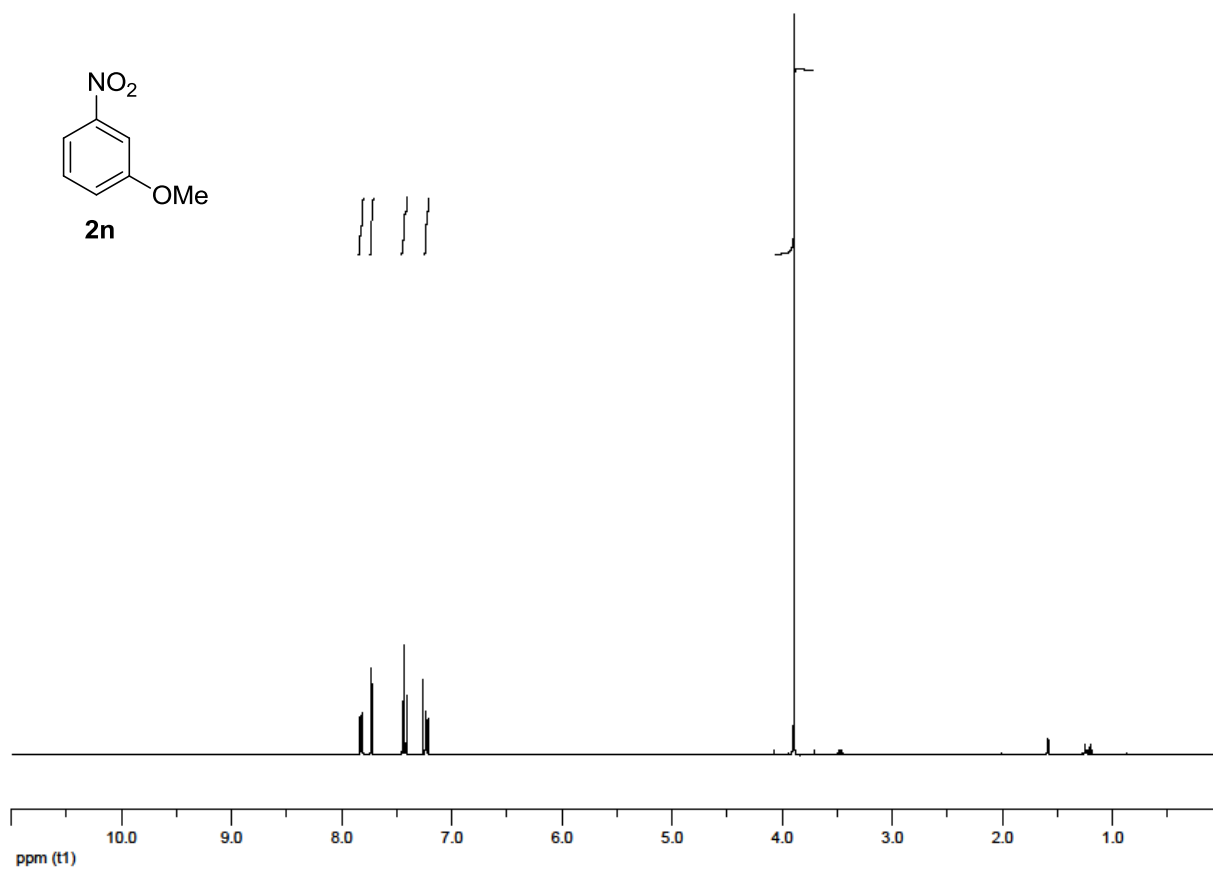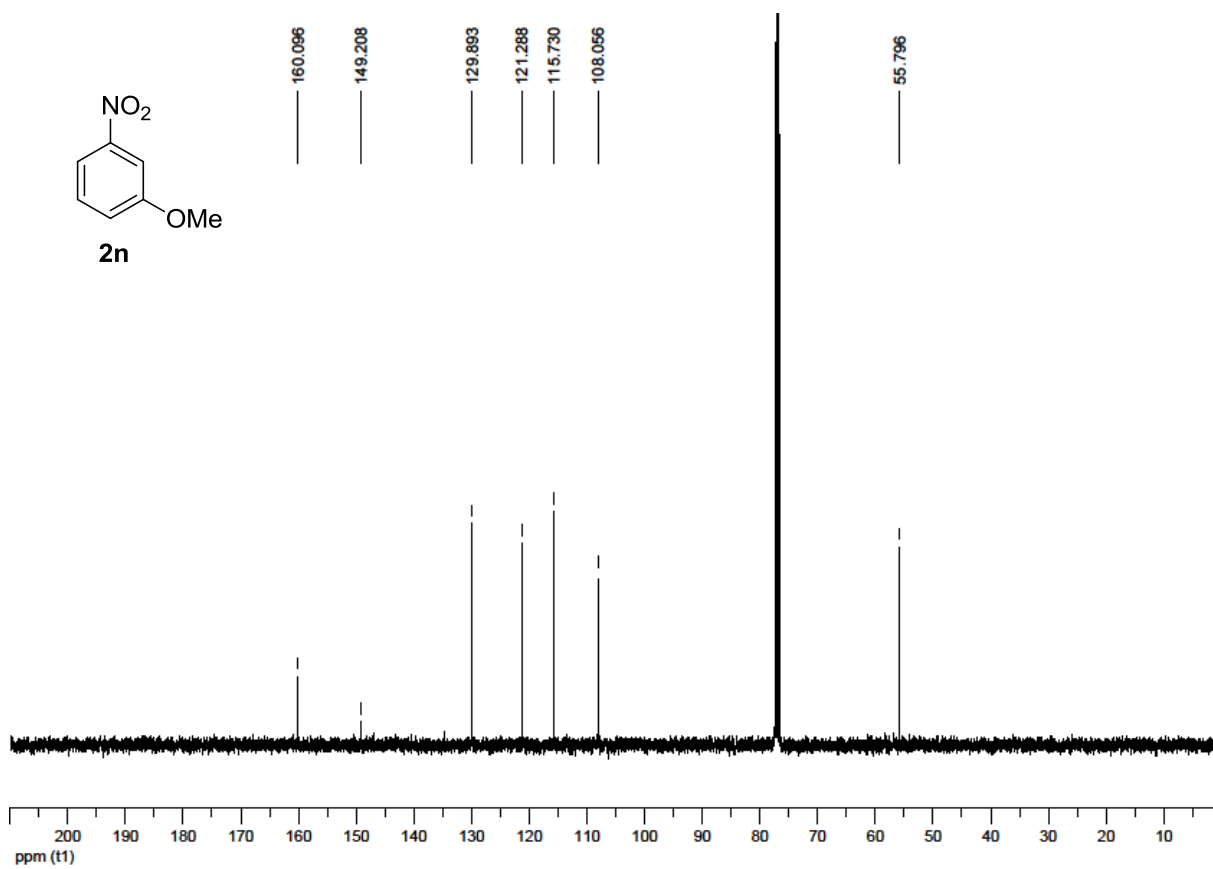

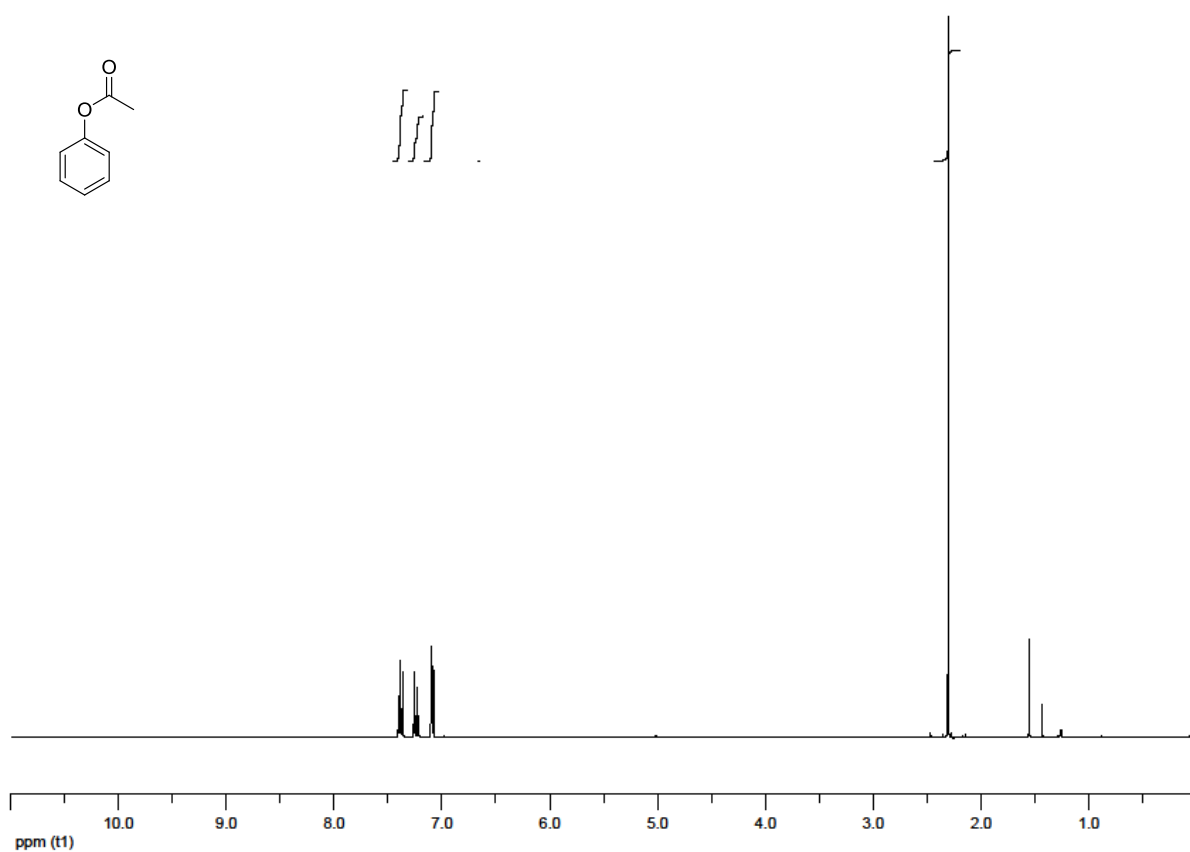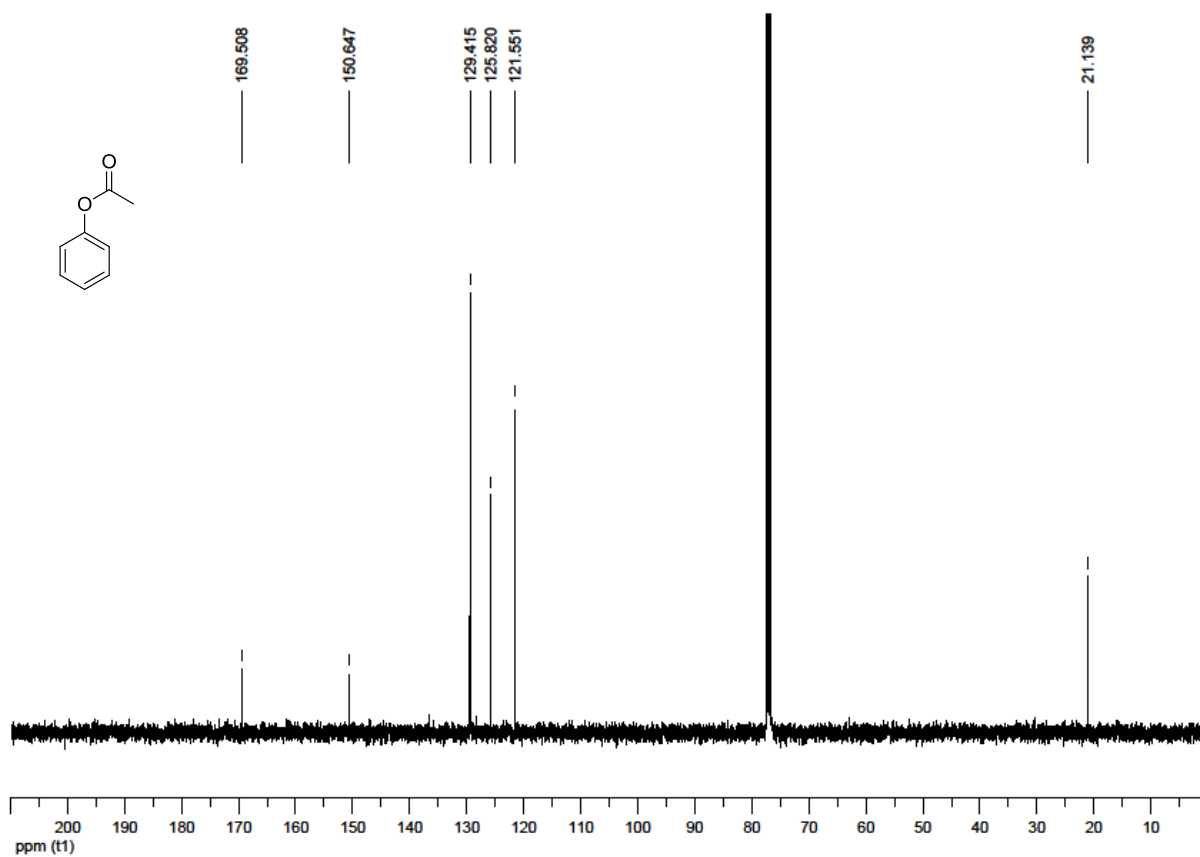

### Crude $^1\text{H}$ NMR Spectra of Volatile Products (Nitromethane as the Standard)

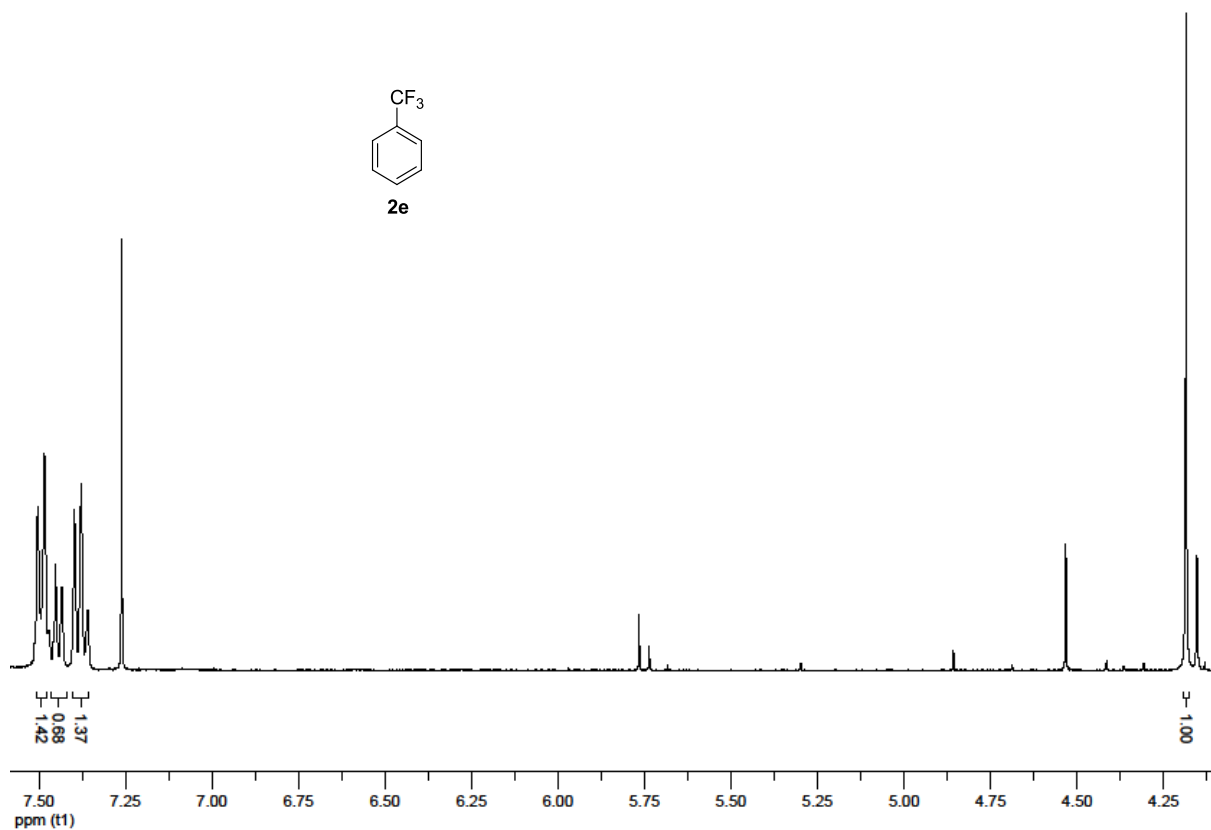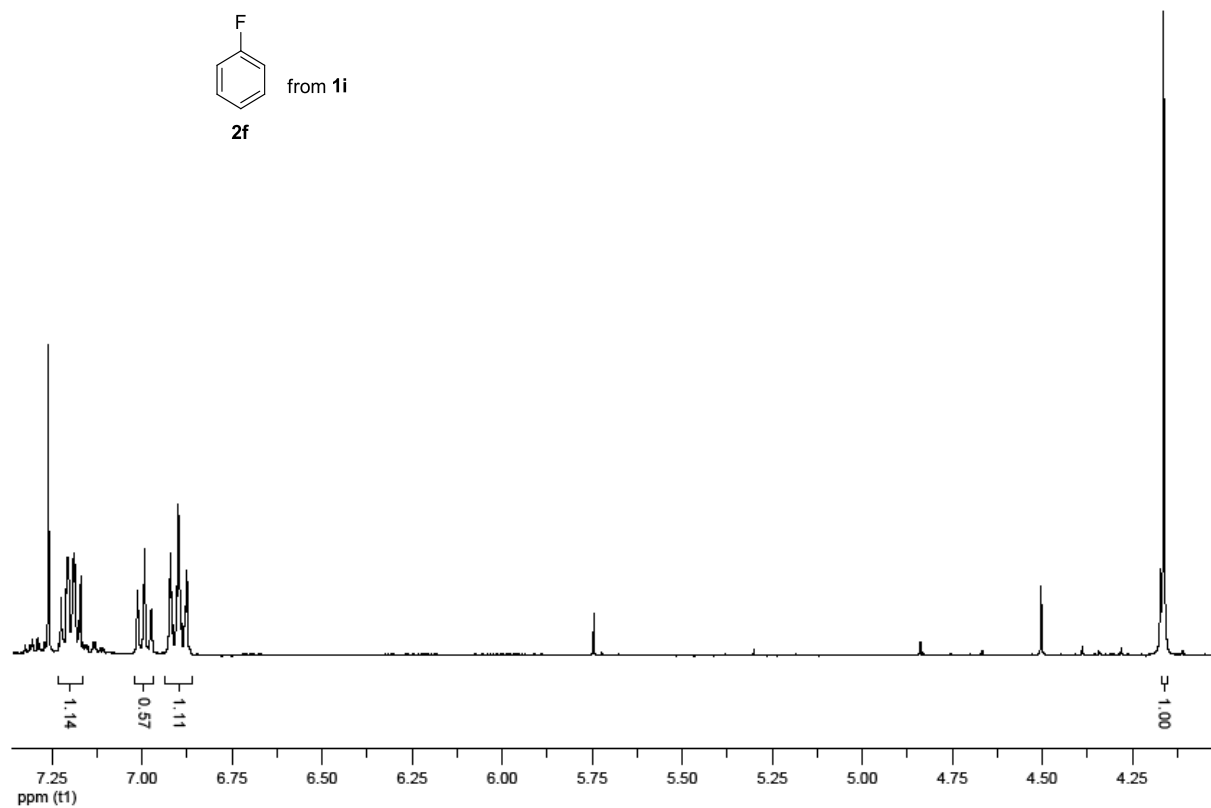

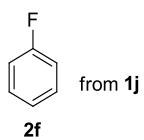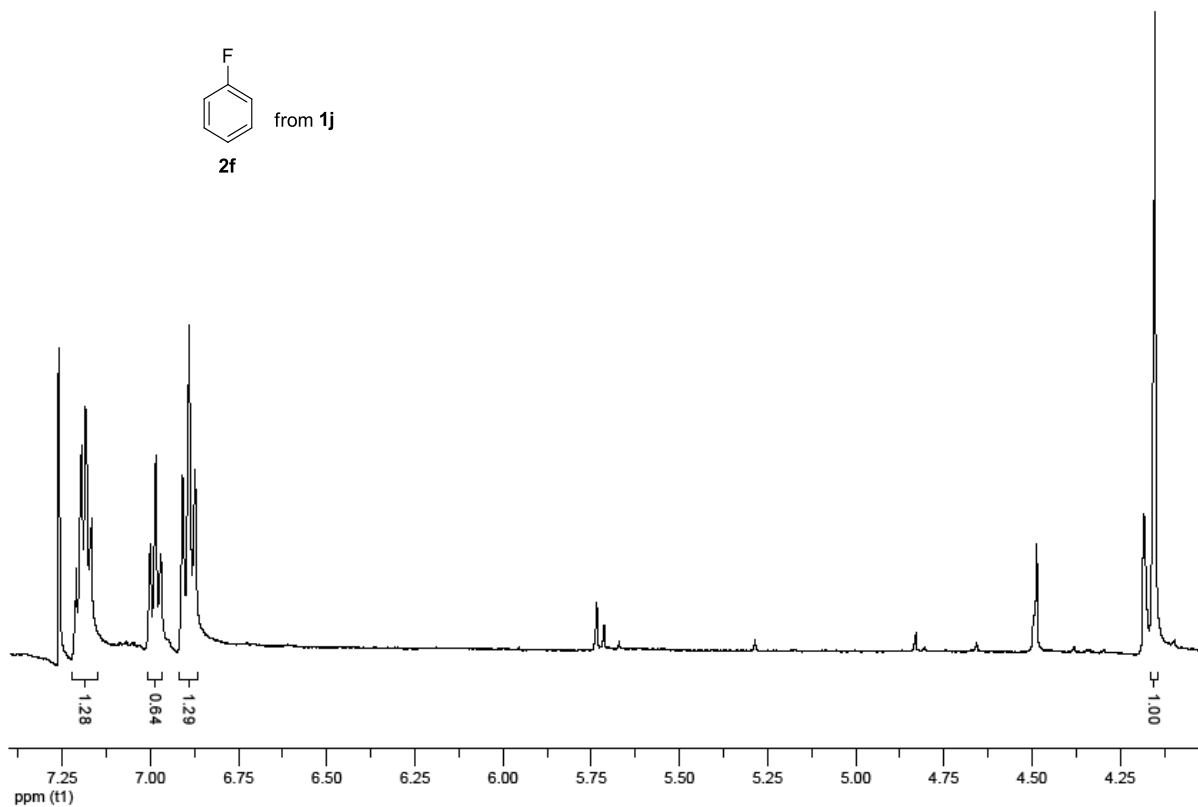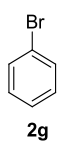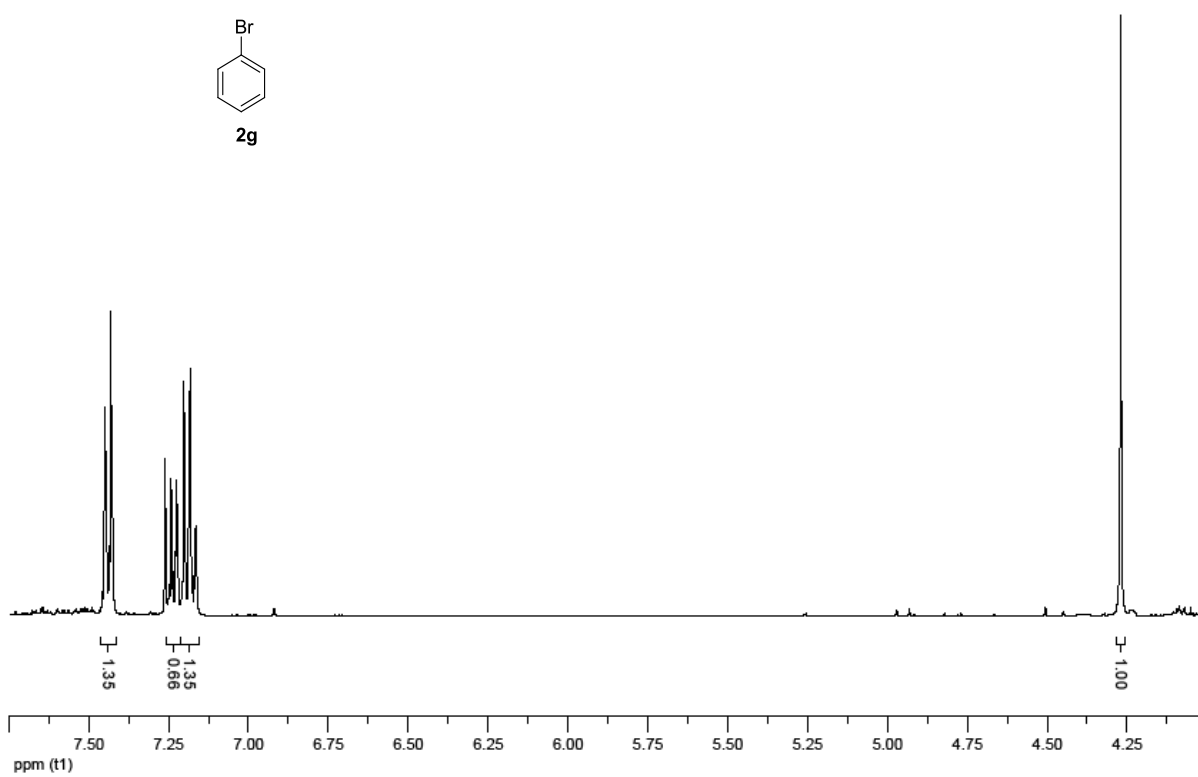

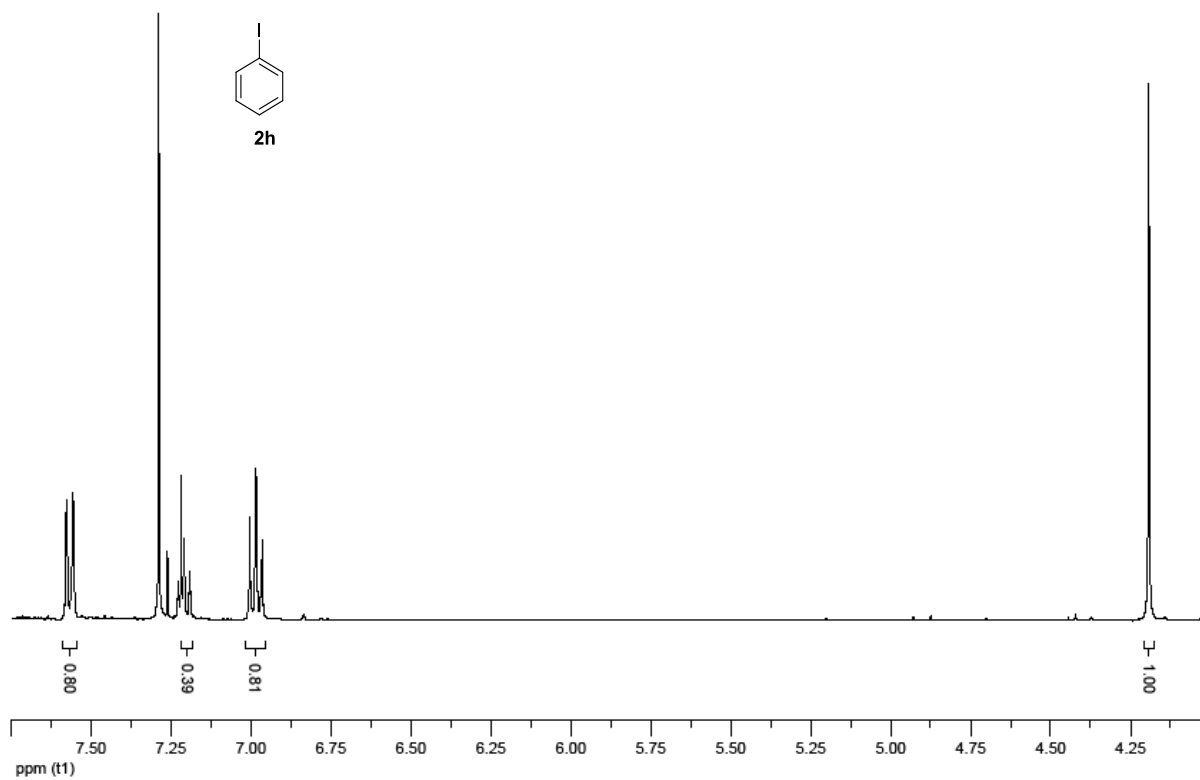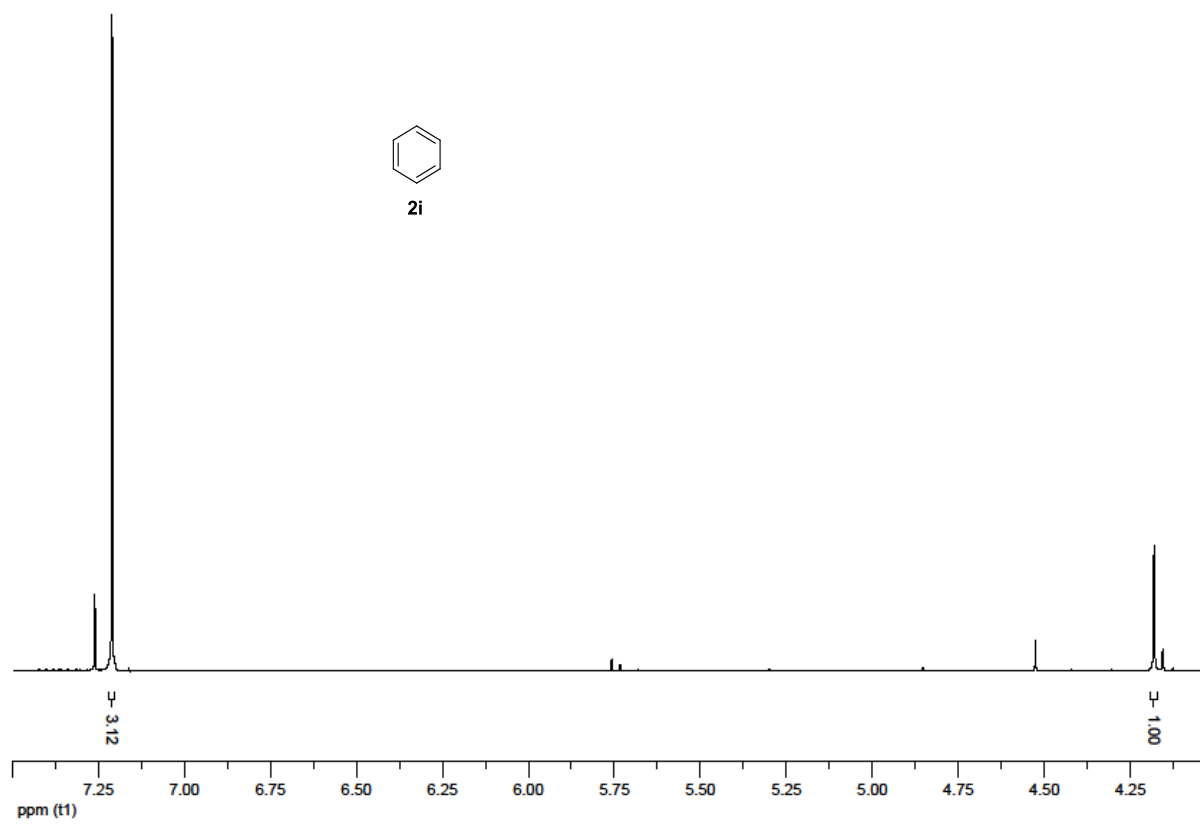

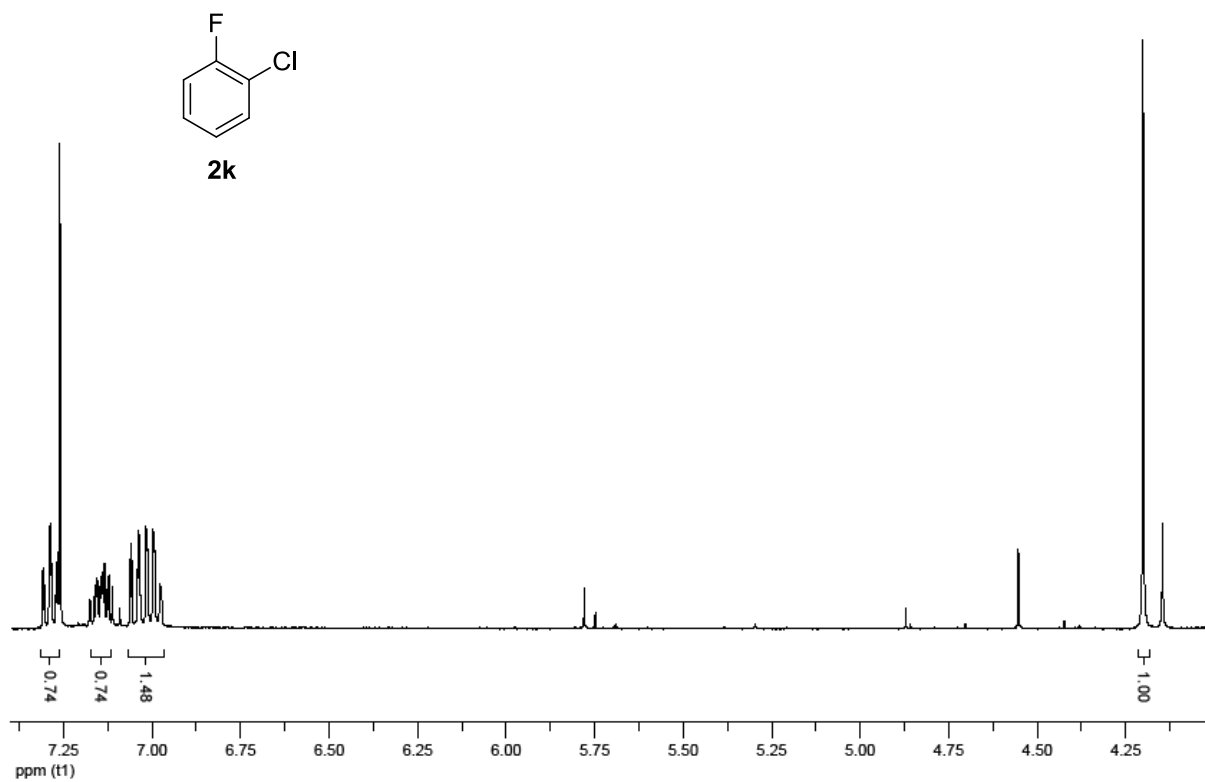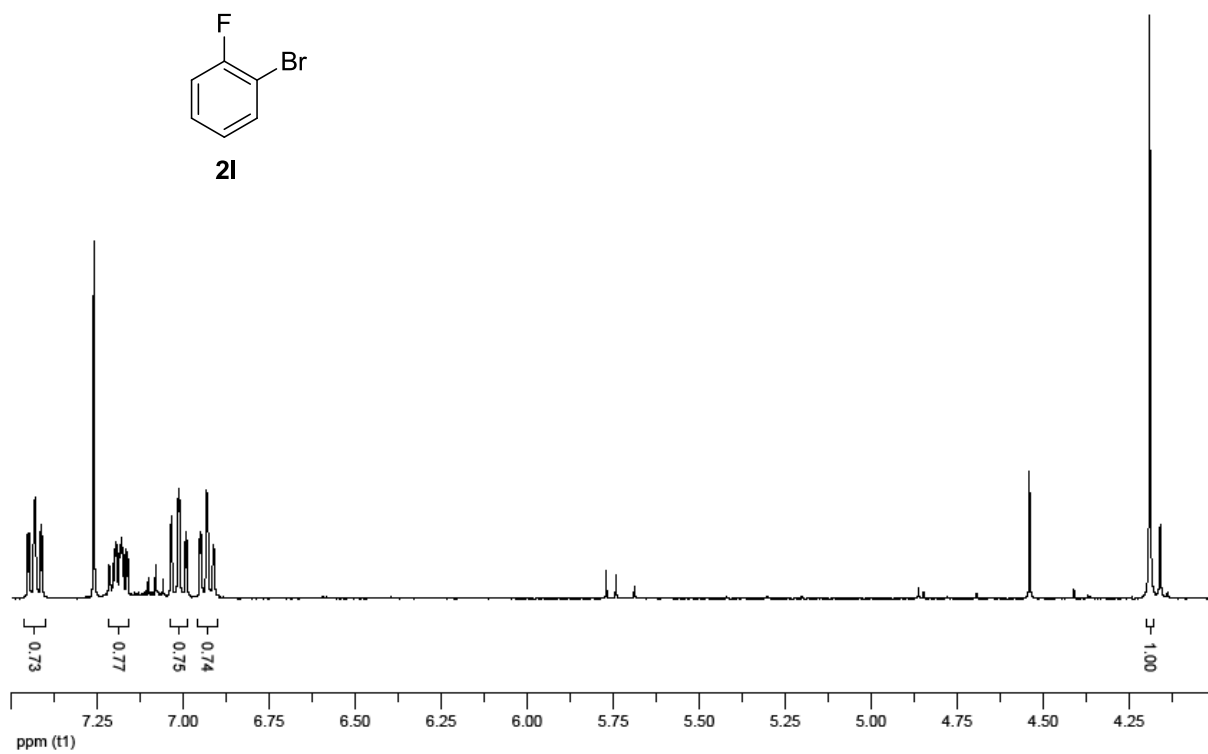

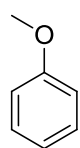

from 1r

**2m**

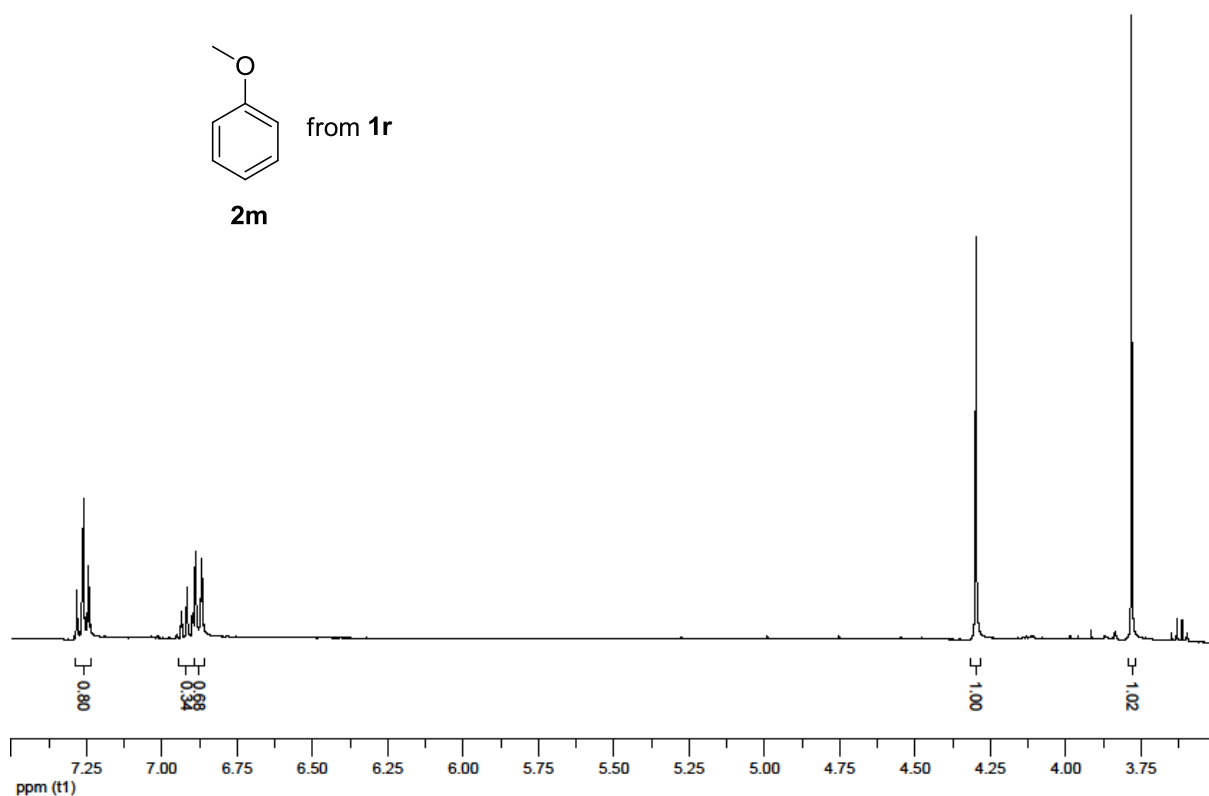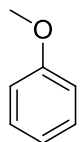

from 1s

**2m**

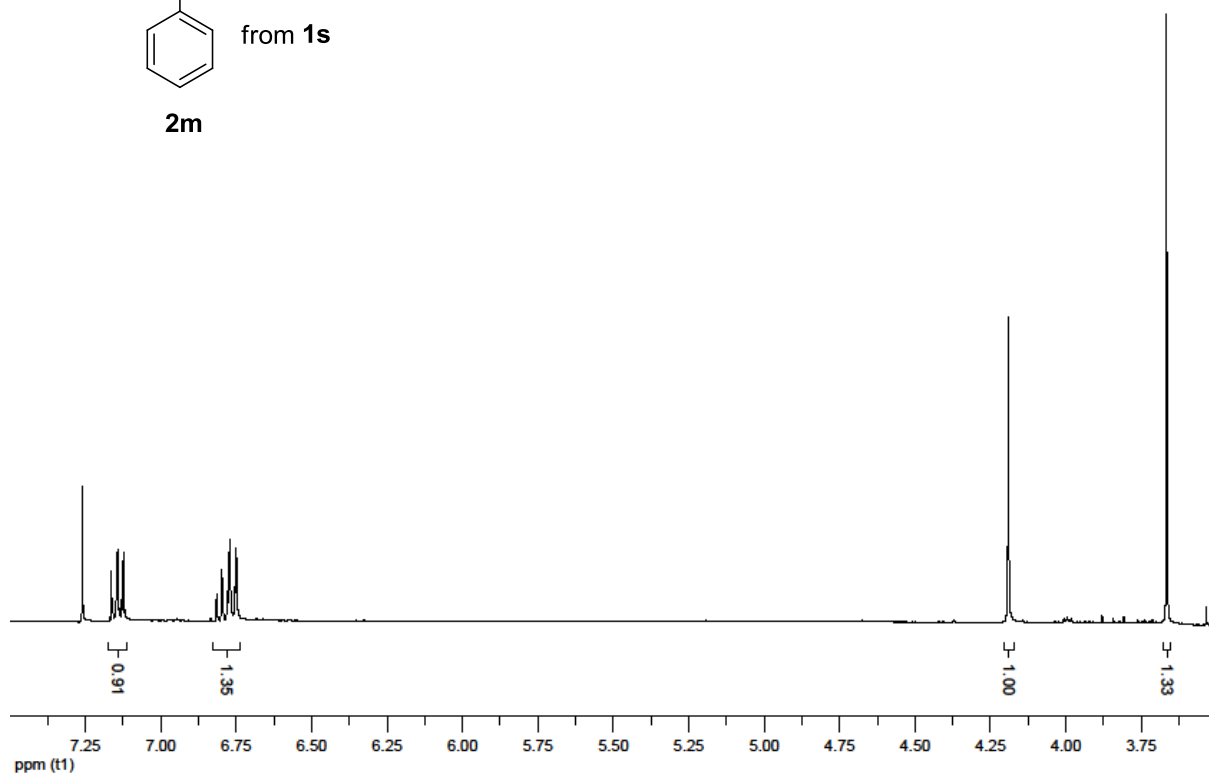

Supplement: c2cc33306f.pdf [file c2cc33306f.pdf]
